# Supplementary material
Source: PubMed Central journal article supplement (PMC6154445)
Supplement: Supp_Data2.pdf [file Supp_Data2.pdf]

---

---

## ANAPHYLACTIC TYPE FOOD ALLERGIES: FOODS

Has the patient experienced any hives, swelling, vomiting, diarrhea, difficulty breathing, wheezing, cough, fainting, or low blood pressure due to and within two hours of eating any of following foods? Please also check the appropriate box(es) if the patient carries an EpiPen related to these foods, or has been diagnosed with an anaphylactic-type of food allergy by a physician.

- Wheat
- Oat
- Barley
- Rye
- All gluten (for example: wheat, oat, barley, and rye)
- Dairy (for example: milk, cheese, yogurt that contain cow's milk)
- Soy
- Egg
- Peanut
- Any tree nut (for example: almond, almond milk, hazelnut, Nutella, cashew, pistachio, walnut, pecan, pine nut, brazil nut)
- Fish
- Shellfish (for example: shrimp, crab, lobster)
- Other 1
- Other 2
- Other 3
- Other 4
- None

Age of onset for wheat allergy?

\_\_\_\_\_

(IN YEARS)

Age of resolution for wheat allergy if outgrown?

\_\_\_\_\_

(IN YEARS)

Age of onset for oat allergy?

\_\_\_\_\_  
(IN YEARS)

Age of resolution for oat allergy if outgrown?

\_\_\_\_\_  
(IN YEARS)

Age of onset for barley allergy?

\_\_\_\_\_  
(IN YEARS)

Age of resolution for barley allergy if outgrown?

\_\_\_\_\_  
(IN YEARS)

Age of onset for rye allergy?

\_\_\_\_\_  
(IN YEARS)

Age of resolution for rye allergy if outgrown?

\_\_\_\_\_  
(IN YEARS)

Age of onset for all gluten allergy?

\_\_\_\_\_  
(IN YEARS)

Age of resolution for all gluten allergy if outgrown?

\_\_\_\_\_  
(IN YEARS)

Age of onset for dairy allergy?

\_\_\_\_\_  
(IN YEARS)

Age of resolution for dairy allergy if outgrown?

\_\_\_\_\_  
(IN YEARS)

Age of onset for soy allergy?

\_\_\_\_\_  
(IN YEARS)

Age of resolution for soy allergy if outgrown?

\_\_\_\_\_  
(IN YEARS)

Age of onset for egg allergy?

\_\_\_\_\_  
(IN YEARS)

Age of resolution for egg allergy if outgrown?

\_\_\_\_\_  
(IN YEARS)

Age of onset for peanut allergy?

\_\_\_\_\_  
(IN YEARS)

Age of resolution for peanut allergy if outgrown?

\_\_\_\_\_  
(IN YEARS)

Age of onset for tree nut allergy?

\_\_\_\_\_  
(IN YEARS)

Age of resolution for tree nut allergy if outgrown?

\_\_\_\_\_  
(IN YEARS)

Age of onset for fish allergy?

\_\_\_\_\_  
(IN YEARS)

Age of resolution for fish allergy if outgrown?

\_\_\_\_\_  
(IN YEARS)

Age of onset for shellfish allergy?

\_\_\_\_\_  
(IN YEARS)

Age of resolution for shellfish allergy if outgrown?

\_\_\_\_\_  
(IN YEARS)

If other, what is the food?

\_\_\_\_\_

Age of onset for [fhx\_other1] allergy?

\_\_\_\_\_  
(IN YEARS)

Age of resolution for [fhx\_other1] allergy if outgrown?

\_\_\_\_\_  
(IN YEARS)

If other, what is the food?

\_\_\_\_\_

Age of onset for [fhx\_other2] allergy?

\_\_\_\_\_  
(IN YEARS)

Age of resolution for [fhx\_other2] allergy if outgrown?

\_\_\_\_\_  
(IN YEARS)

If other, what is the food?

\_\_\_\_\_

Age of onset for [fhx\_other3] allergy?

\_\_\_\_\_  
(IN YEARS)

Age of resolution for [fhx\_other3] allergy if outgrown?

\_\_\_\_\_  
(IN YEARS)

If other, what is the food?

\_\_\_\_\_

Age of onset for [fhx\_other4] allergy?

\_\_\_\_\_  
(IN YEARS)

Age of resolution for [fhx\_other4] allergy if outgrown?

\_\_\_\_\_  
(IN YEARS)

---

---

## **ANAPHYLACTIC TYPE FOOD ALLERGIES: MEDICATIONS**

Does the patient use (or is prescribed) an epinephrine auto-injector?

Yes  
 No

Does the patient use (or is prescribed) an inhaler?

Yes  
 No

---

## PANS EXACERBATIONS DUE TO FOODS

Is the patient avoiding any of these foods due to concerns that they worsen PANS symptoms?

- Wheat
- Oat
- Barley
- Rye
- All gluten (for example: wheat, oat, barley, and rye)
- Dairy (for example: milk, cheese, yogurt that contain cow's milk)
- Soy
- Egg
- Peanut
- Any tree nut (for example: almond, almond milk, hazelnut, Nutella, cashew, pistachio, walnut, pecan, pine nut, brazil nut)
- Fish
- Shellfish (for example: shrimp, crab, lobster)
- Other 1
- Other 2
- Other 3
- Other 4
- None

Age of onset of wheat avoidance due to concerns of worsening PANS symptoms?

\_\_\_\_\_  
(IN YEARS)

Age of onset of oat avoidance due to concerns of worsening PANS symptoms?

\_\_\_\_\_  
(IN YEARS)

Age of onset of barley avoidance due to concerns of worsening PANS symptoms?

\_\_\_\_\_  
(IN YEARS)

Age of onset of rye avoidance due to concerns of worsening PANS symptoms?

\_\_\_\_\_  
(IN YEARS)

Age of onset of gluten avoidance due to concerns of worsening PANS symptoms?

\_\_\_\_\_  
(IN YEARS)

Age of onset of dairy avoidance due to concerns of worsening PANS symptoms?

\_\_\_\_\_  
(IN YEARS)

Age of onset of soy avoidance due to concerns of worsening PANS symptoms?

\_\_\_\_\_  
(IN YEARS)

Age of onset of egg avoidance due to concerns of worsening PANS symptoms?

\_\_\_\_\_  
(IN YEARS)

Age of onset of peanut avoidance due to concerns of worsening PANS symptoms?

\_\_\_\_\_  
(IN YEARS)

Age of onset of tree nut avoidance due to concerns of worsening PANS symptoms?

\_\_\_\_\_  
(IN YEARS)

Age of onset of fish avoidance due to concerns of worsening PANS symptoms?

\_\_\_\_\_  
(IN YEARS)

Age of onset of shellfish avoidance due to concerns of worsening PANS symptoms?

\_\_\_\_\_  
(IN YEARS)

If other, what is the food?

\_\_\_\_\_

Age of onset of [fhx\_other1] avoidance due to concerns of worsening PANS symptoms)?

\_\_\_\_\_  
(IN YEARS)

If other, what is the food?

\_\_\_\_\_

Age of onset of [fhx\_other2] avoidance due to concerns of worsening PANS symptoms?

\_\_\_\_\_  
(IN YEARS)

If other, what is the food?

\_\_\_\_\_

Age of onset of [fhx\_other3] avoidance due to concerns of worsening PANS symptoms?

\_\_\_\_\_  
(IN YEARS)

If other, what is the food?

\_\_\_\_\_

Age of onset of [fhx\_other4] avoidance due to concerns of worsening PANS symptoms?

\_\_\_\_\_  
(IN YEARS)

---

---

## OTHER FOOD ISSUES

History of celiac disease diagnosed by a physician?

Yes  No

Age of celiac disease diagnosis:

\_\_\_\_\_  
(IN YEARS)

Details of celiac disease (ie, how the diagnosis was made, etc):

History of eosinophilic gastro-intestinal (ie, eosinophilic esophagitis) disease diagnosed by a physician?

Yes  No

Age of eosinophilic gastro-intestinal disease diagnosis:

\_\_\_\_\_  
(IN YEARS)

Details of eosinophilic gastro-intestinal disease (ie, to which food, how the diagnosis was made, etc):

History of FPIES ("food-protein induced enterocolitis syndrome") diagnosed by a physician?

Yes  No

Age of FPIES diagnosis:

\_\_\_\_\_  
(IN YEARS)

Details of FPIES (ie, to which food, how the diagnosis was made, etc):

History of milk-protein induced proctocolitis (ie, bloody stool from dairy intake or breastfeeding with maternal dairy intake "breastfeeding milk allergy") diagnosed by a physician?

Yes  No

Age of milk-protein induced proctocolitis:

\_\_\_\_\_  
(IN YEARS)

Details of milk-protein induced proctocolitis (ie, to which food, how the diagnosis was made, etc):

---

## NON-FOOD ALLERGY HISTORY

History of atopic dermatitis (aka eczema)?

Yes  No

Age of onset of atopic dermatitis:

\_\_\_\_\_

(IN YEARS)

Exacerbated by foods?

Yes

No

Atopic dermatitis exacerbated by any of these foods?

Wheat

Oat

Barley

Rye

All gluten (for example: wheat, oat, barley, and rye)

Dairy (for example: milk, cheese, yogurt that contain cow's milk)

Soy

Egg

Peanut

Any tree nut (for example: almond, almond milk, hazelnut, Nutella, cashew, pistachio, walnut, pecan, pine nut, brazil nut)

Fish

Shellfish (for example: shrimp, crab, lobster)

Other 1

Other 2

Other 3

Other 4

None

Is the atopic dermatitis outgrown?

Yes

No

At what age did patient outgrow his/her atopic dermatitis?

\_\_\_\_\_

(IN YEARS)

History of asthma?

Yes

No

Age of onset of asthma:

\_\_\_\_\_

(IN YEARS)

Viral-induced wheeze?

Yes

No

Exercise-induced wheeze?

Yes

No

Ever been hospitalized for asthma?

Yes

No

Ever been intubated for asthma?

- Yes
- No

Is the asthma outgrown?

- Yes
- No

At what age did patient outgrow his/her asthma?

\_\_\_\_\_  
(IN YEARS)

History of allergic rhinitis (aka, seasonal nasal allergies or hay fever)?

- Yes
- No

Age of onset of allergic rhinitis:

\_\_\_\_\_  
(IN YEARS)

Allergic rhinitis exacerbated by the following:

- Tree pollens
- Grass pollens
- Weed pollens
- Molds
- Dust mites
- Animals
- Others

Other rhinitis exacerbation source:

\_\_\_\_\_

Is the allergic rhinitis outgrown?

- Yes
- No

At what age did patient outgrow his/her allergic rhinitis?

\_\_\_\_\_  
(IN YEARS)



Did the patient's MOTHER perceive an improvement of PANS symptoms from food avoidance?

- Yes
- No
- Not applicable
- Uncertain

The MOTHER perceived which of these foods improved the patient's PANS symptoms?

- Wheat
- Oat
- Barley
- Rye
- All gluten
- Dairy (ie, milk, cheese, yogurt that contain cow's milk)
- Soy
- Egg
- Peanut
- Any tree nut (ie, almond, almond milk, hazelnut, Nutella, cashew, pistachio, walnut, pecan, pine nut, brazil nut)
- Fish
- Shellfish (ie, shrimp, crab, lobster)
- Other 1
- Other 2
- Other 3
- Other 4

If other, what is the food?

\_\_\_\_\_

---

---

### **PERCEIVED IMPROVEMENT FROM FOOD AVOIDANCE: PATIENT'S FATHER**

Did the patient's FATHER perceive an improvement of PANS symptoms from food avoidance?

- Yes
- No
- Not applicable
- Uncertain

The FATHER perceived which of these foods improved the patient's PANS symptoms?

- Wheat
- Oat
- Barley
- Rye
- All gluten
- Dairy (ie, milk, cheese, yogurt that contain cow's milk)
- Soy
- Egg
- Peanut
- Any tree nut (ie, almond, almond milk, hazelnut, Nutella, cashew, pistachio, walnut, pecan, pine nut, brazil nut)
- Fish
- Shellfish (ie, shrimp, crab, lobster)
- Other 1
- Other 2
- Other 3
- Other 4

If other, what is the food?

---

If other, what is the food?

---

If other, what is the food?

---

If other, what is the food?

---
